# Supplementary material
Source: PubMed Central journal article supplement (PMC4491178)
Supplement: ncomms8450-s1.pdf [file ncomms8450-s1.pdf]

Figure 1a

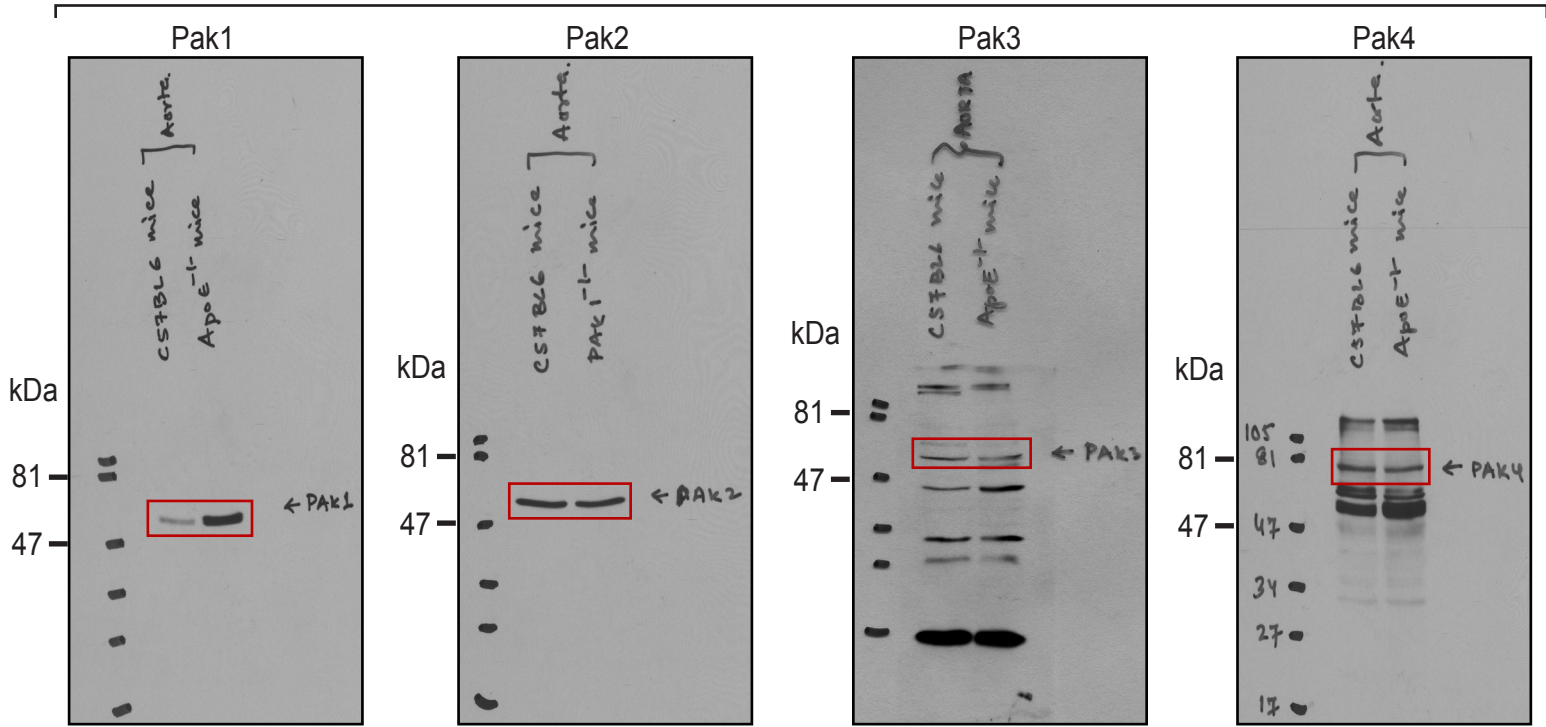

Figure 1b

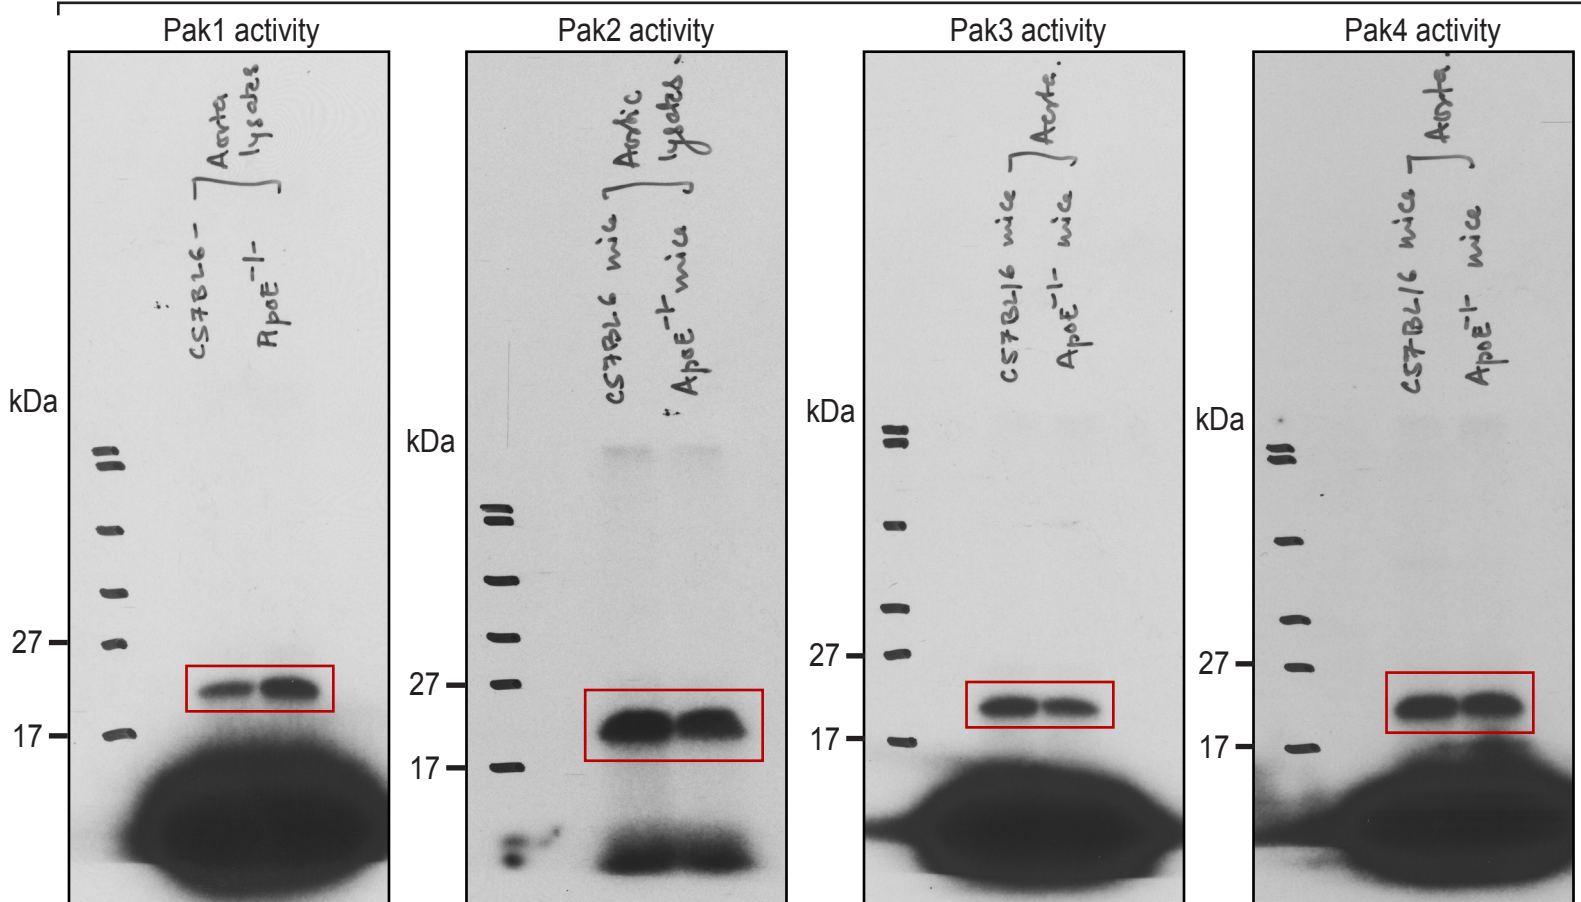

Supplementary Figure 1: Scans of immunoblots presented in Figure 1a & b.

Figure 1c

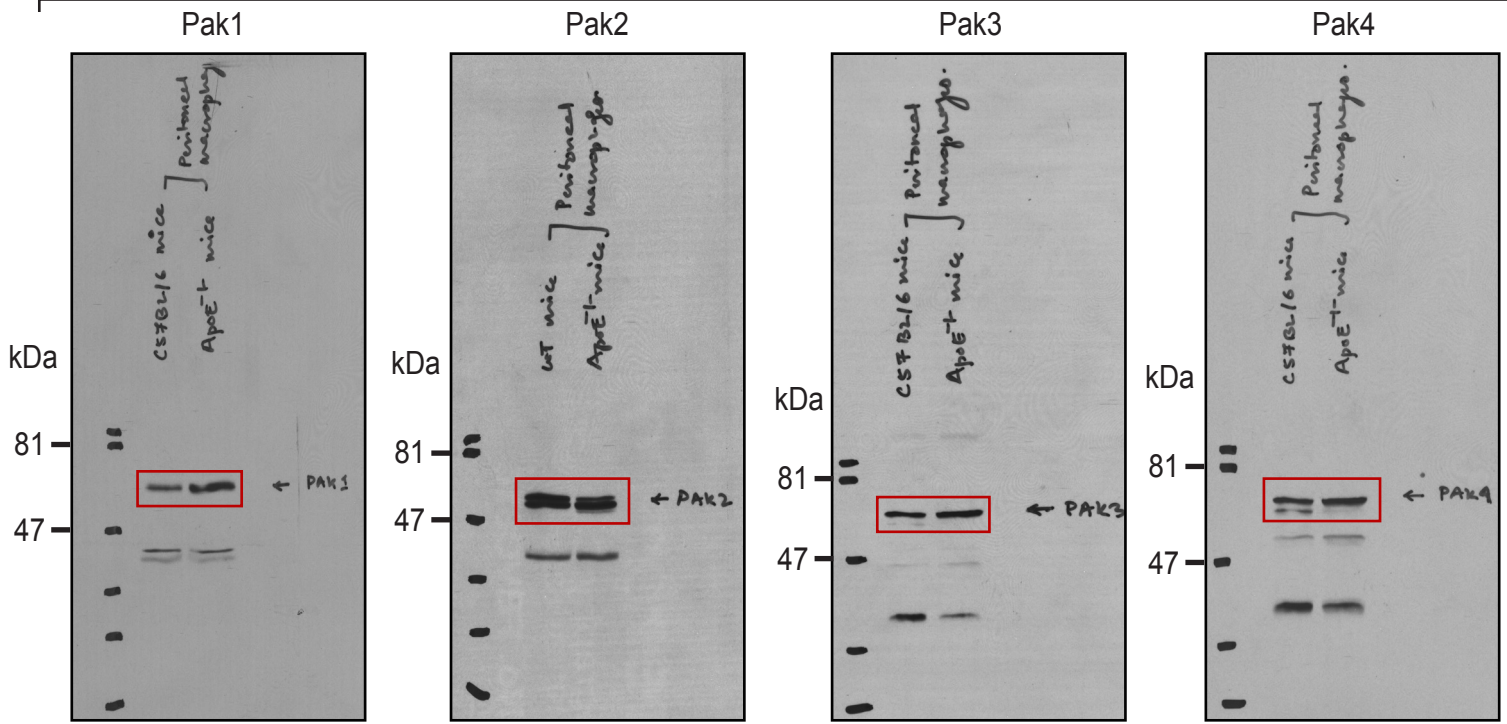

Figure 1d

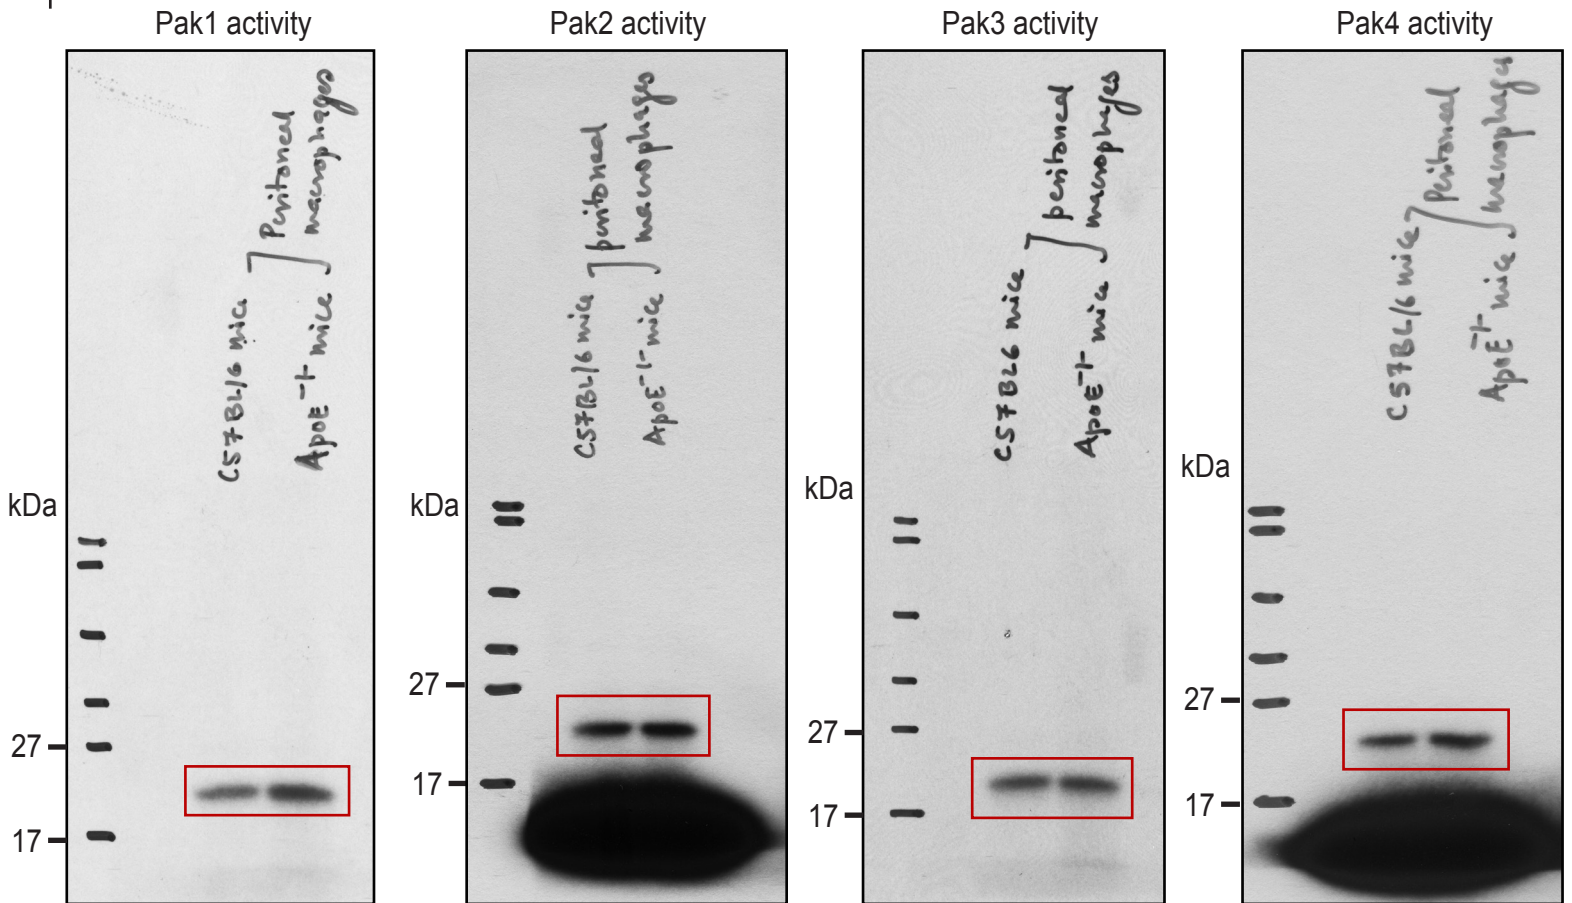

Supplementary Figure 2: Scans of immunoblots presented in Figure 1c & d.



Figure 3c

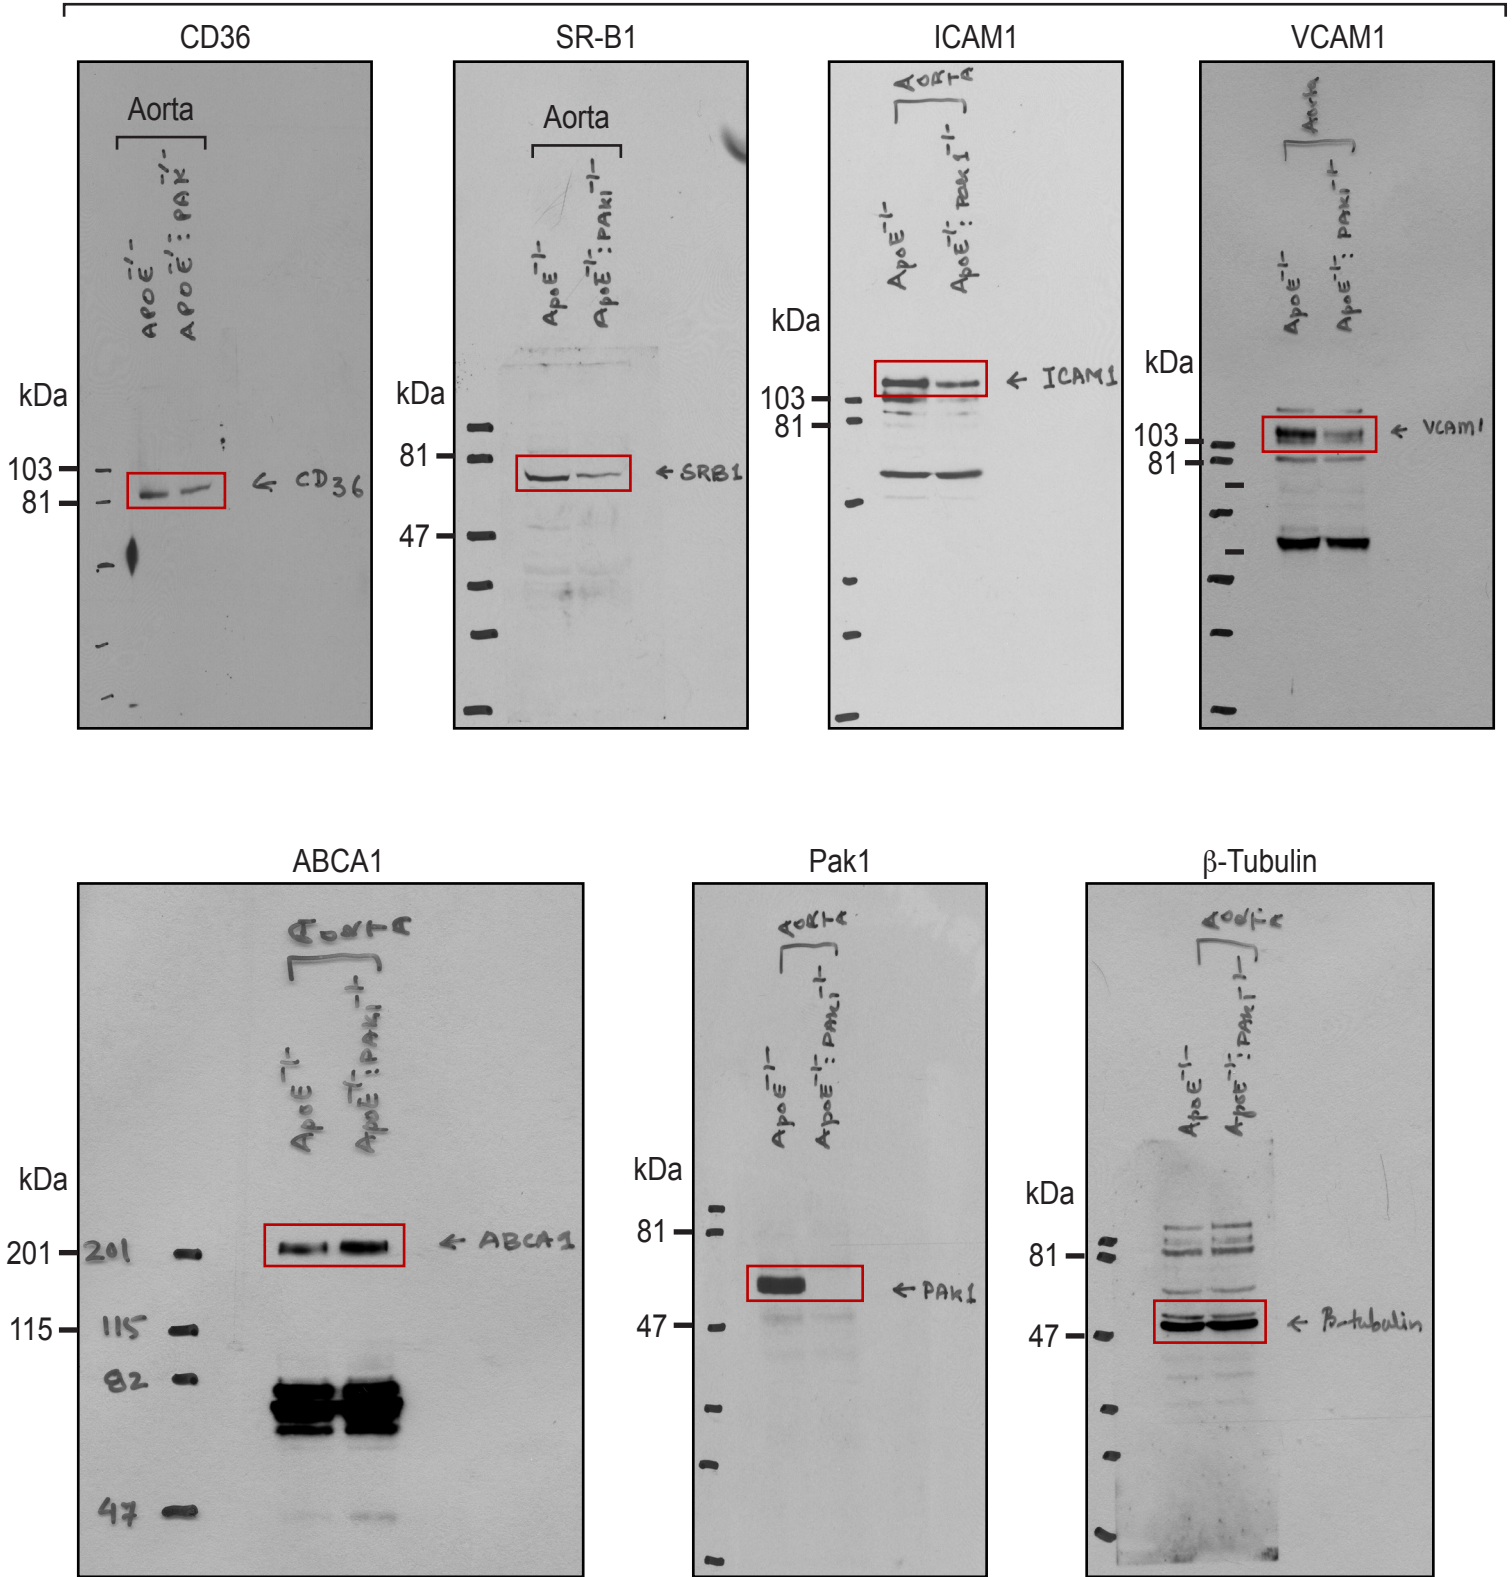

Supplementary Figure 3: Scans of immunoblots presented in Figure 3c.

Figure 3f

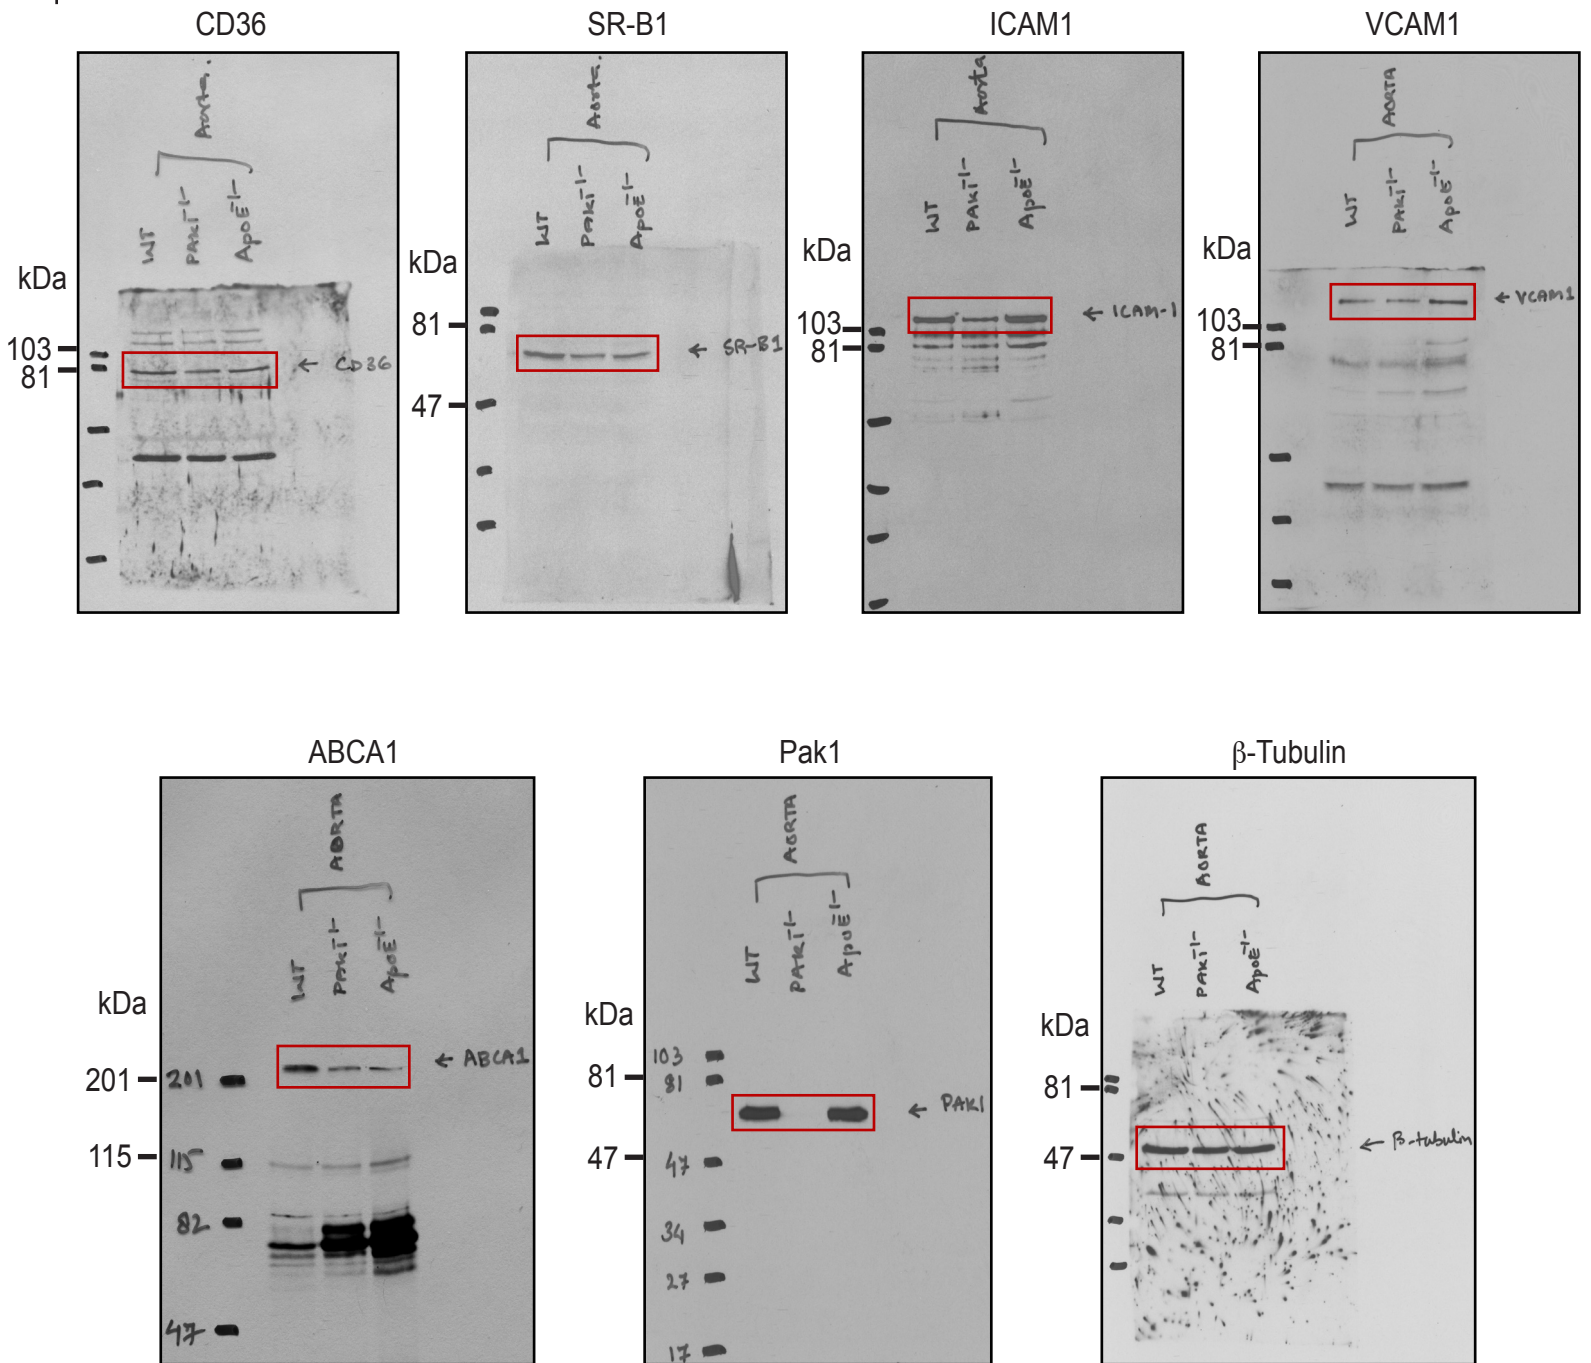

Supplementary Figure 4: Scans of immunoblots presented in Figure 3f.

Figure 4e

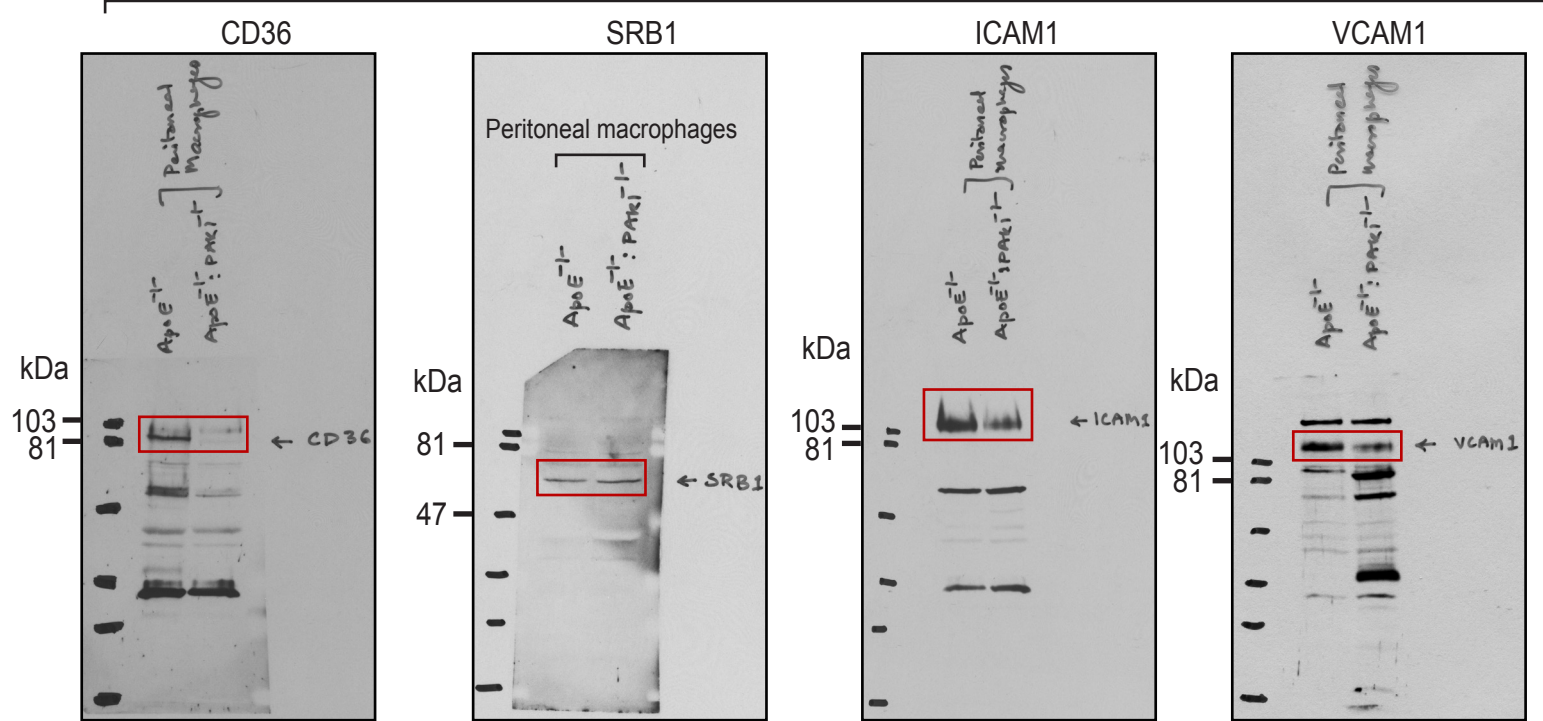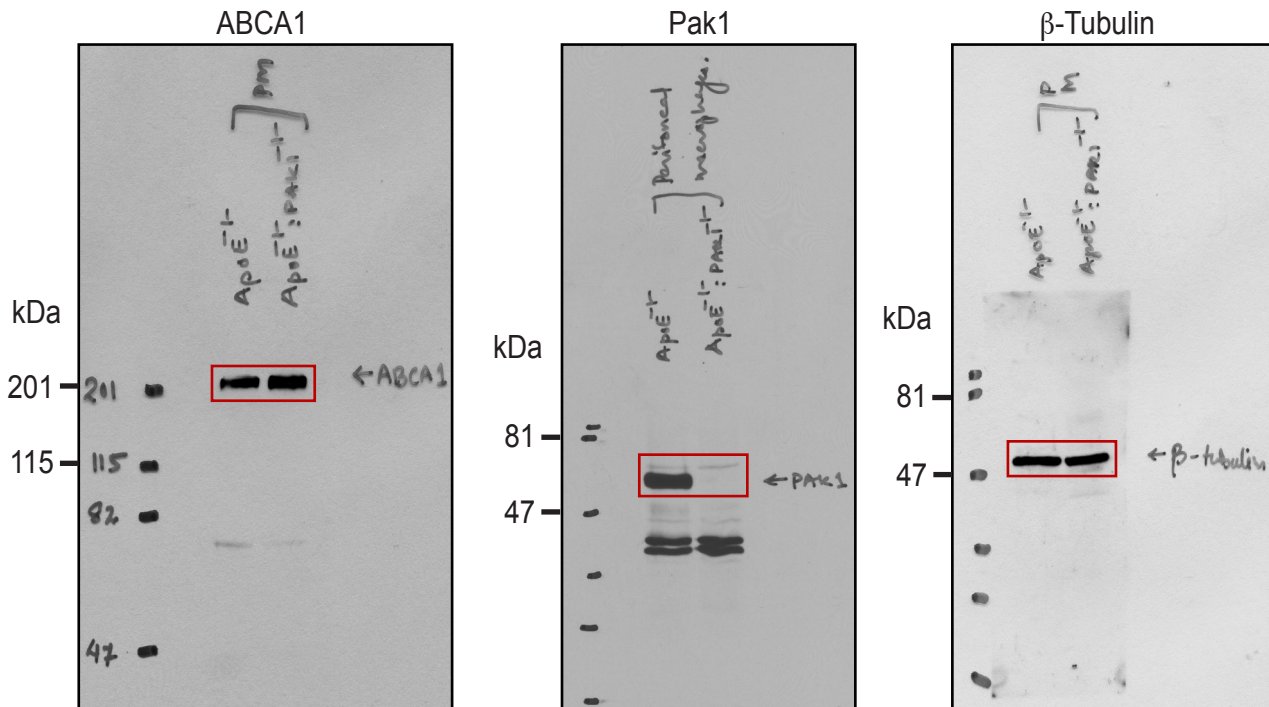

Supplementary Figure 5: Scans of immunoblots presented in Figure 4e.



Figure 4k

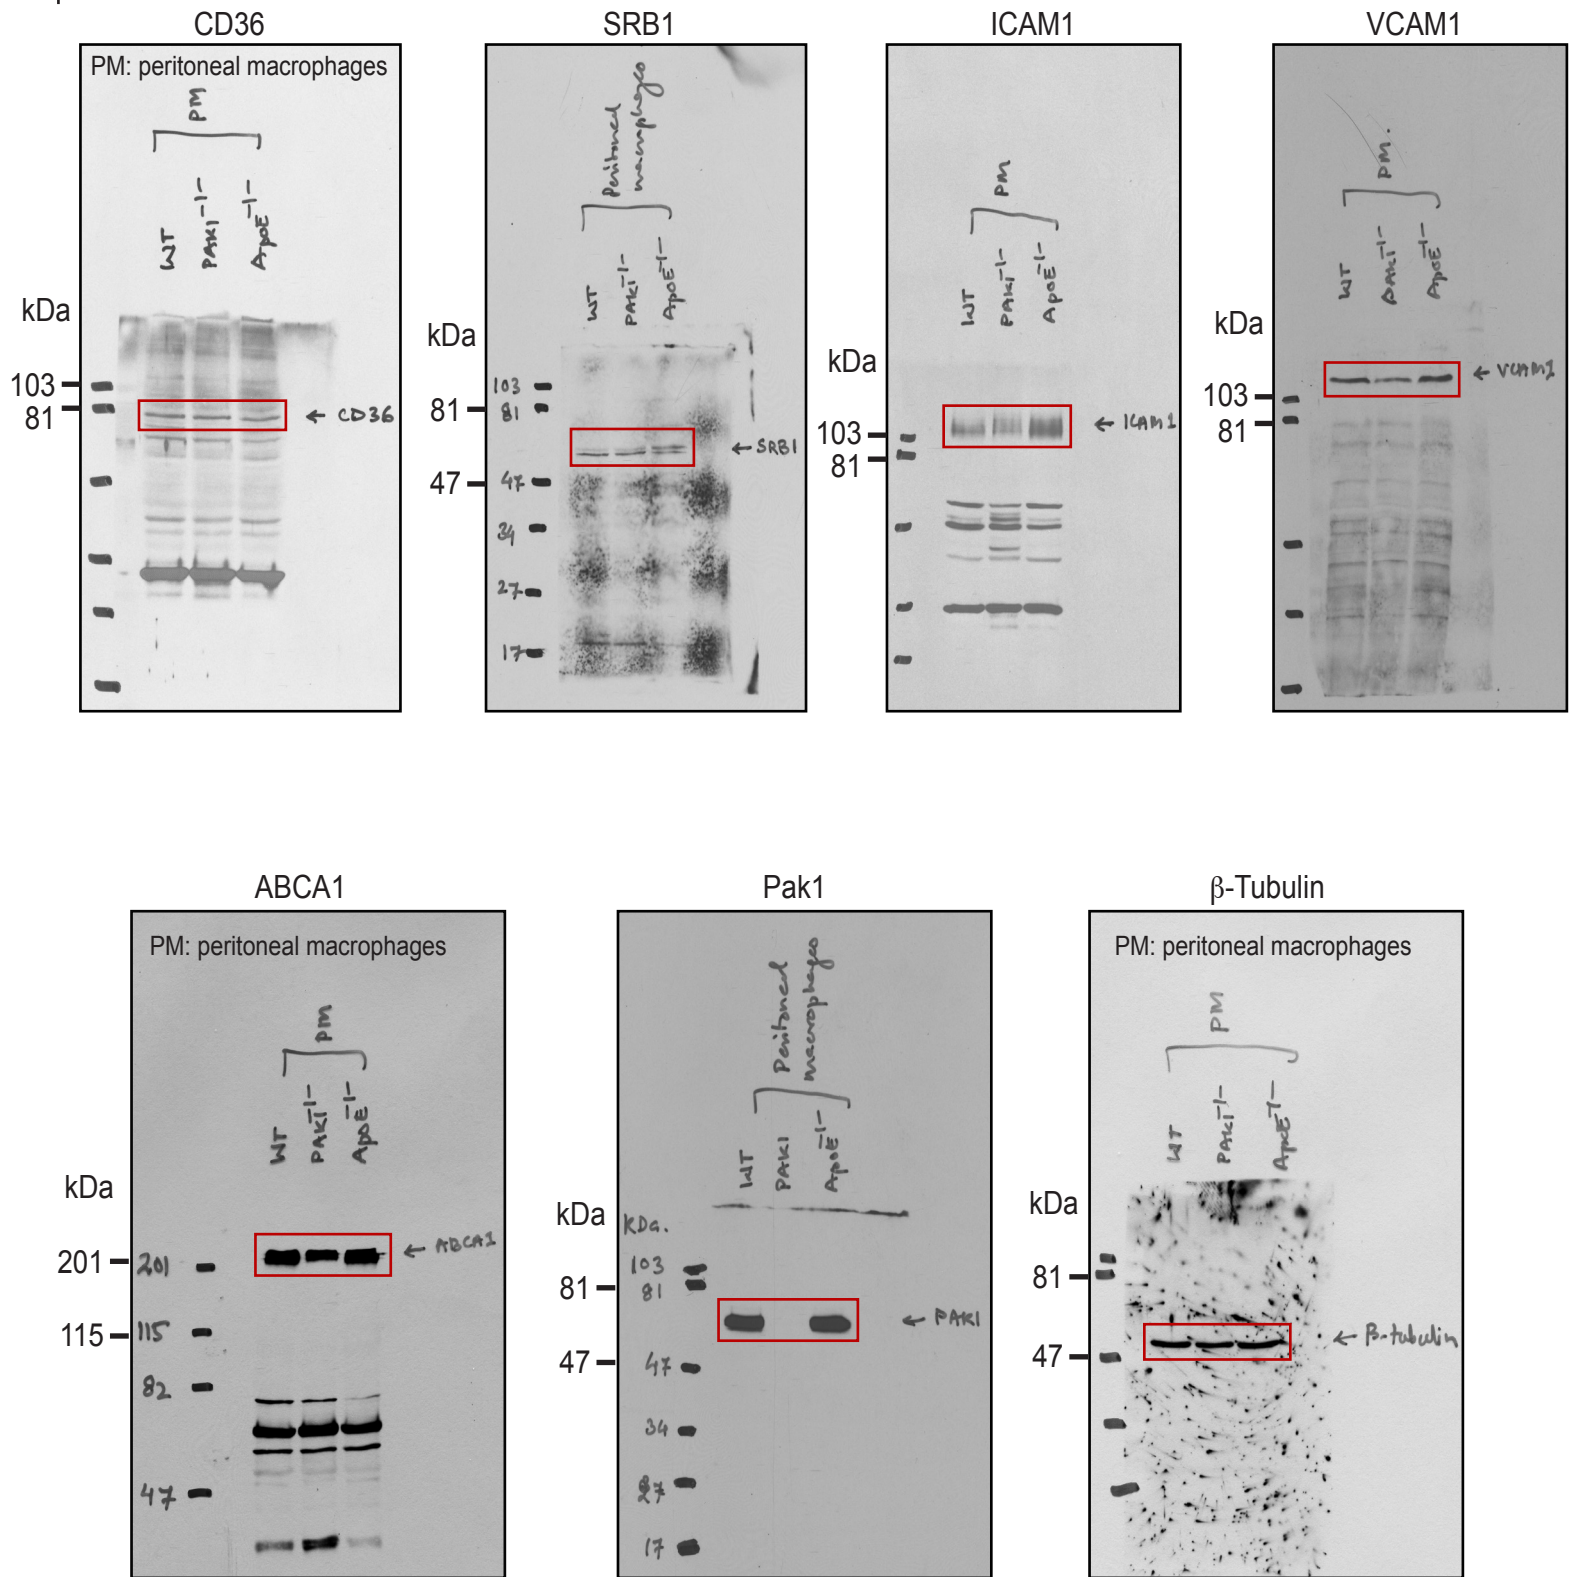

Supplementary Figure 6: Scans of immunoblots presented in Figure 4k.

Figure 5d

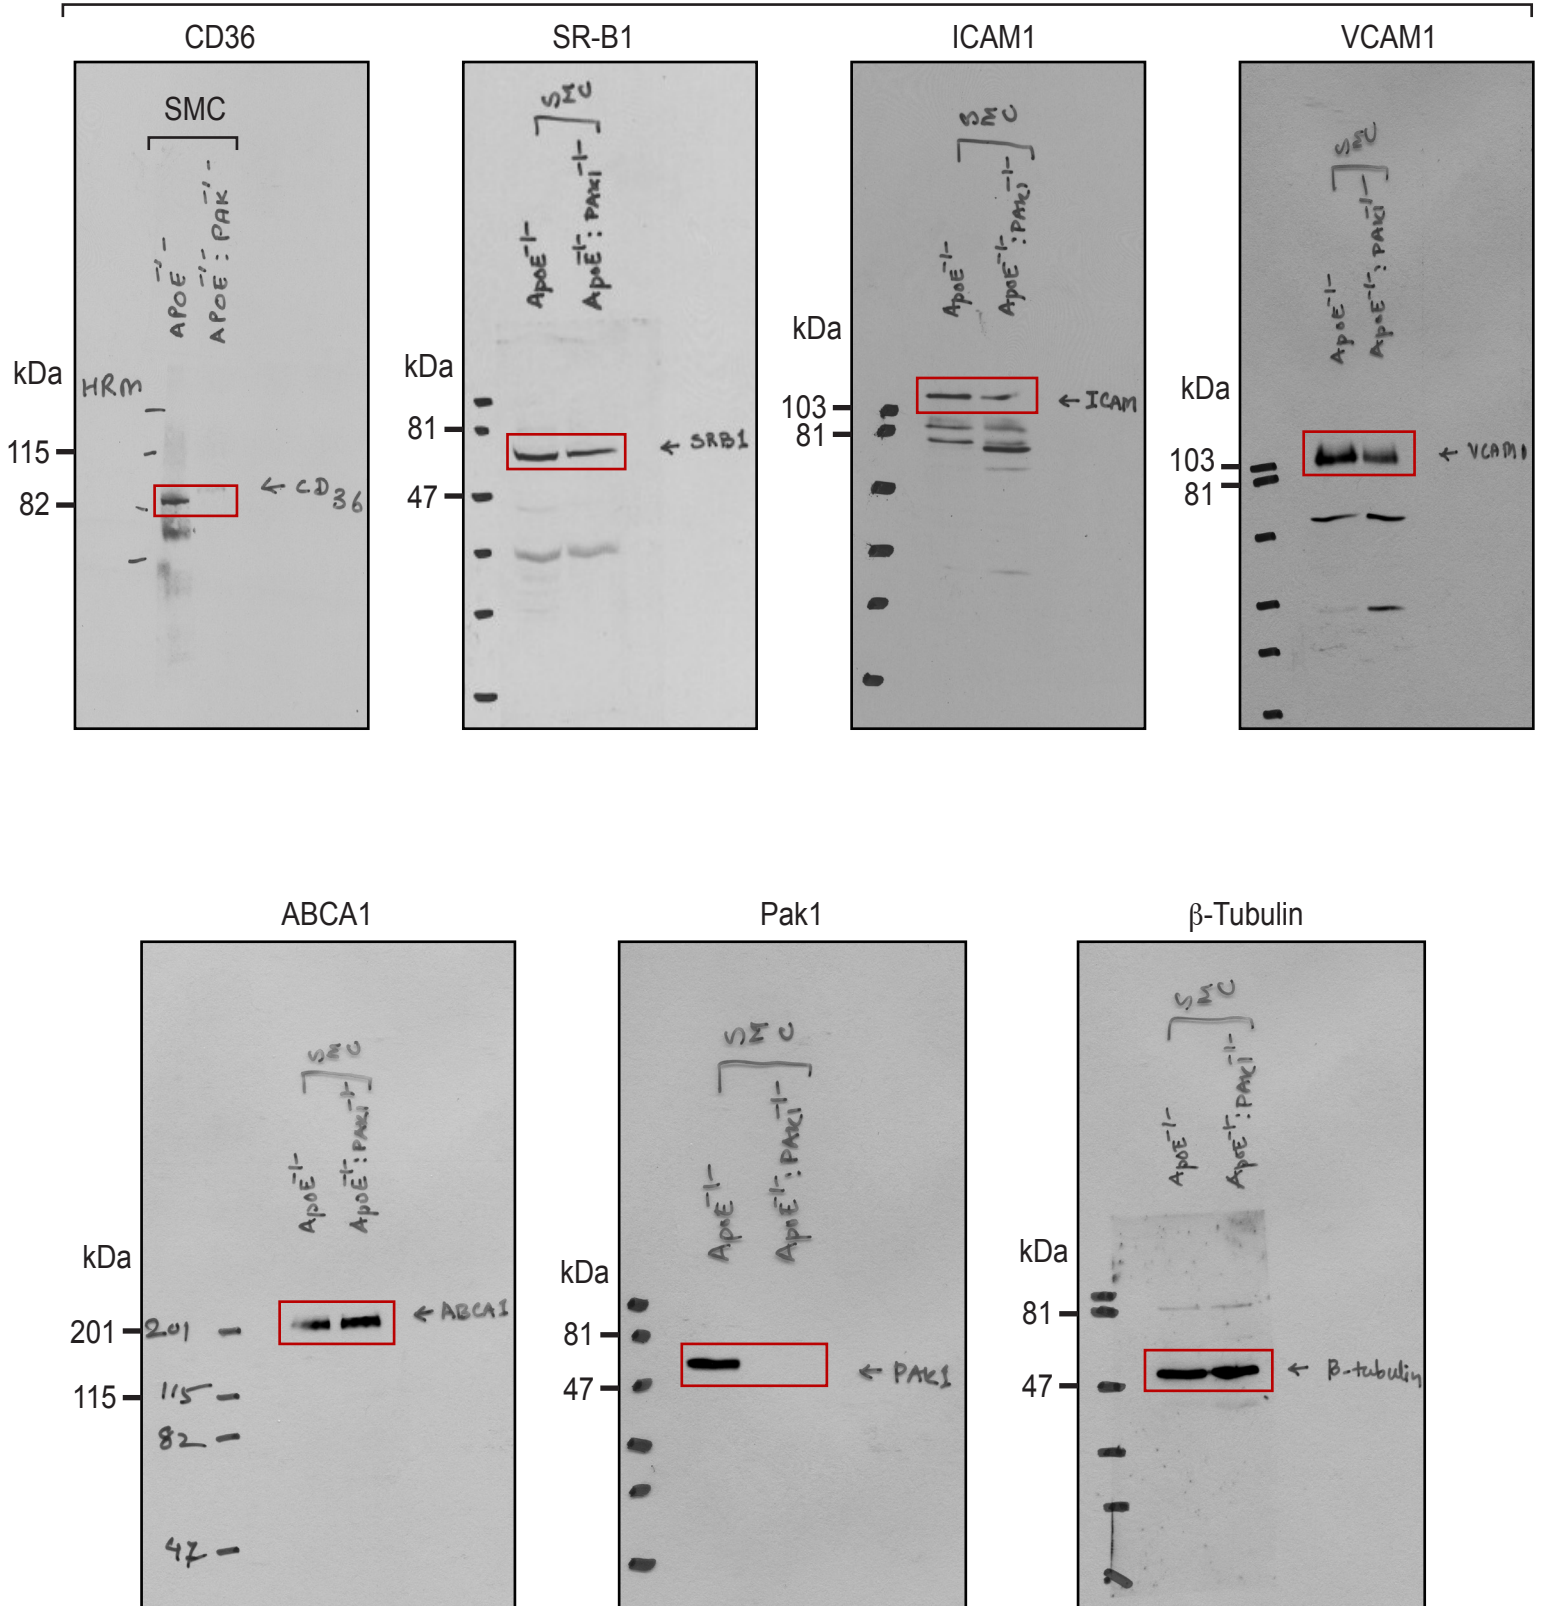

Supplementary Figure 7: Scans of immunoblots presented in Figure 5d.

Figure 5i

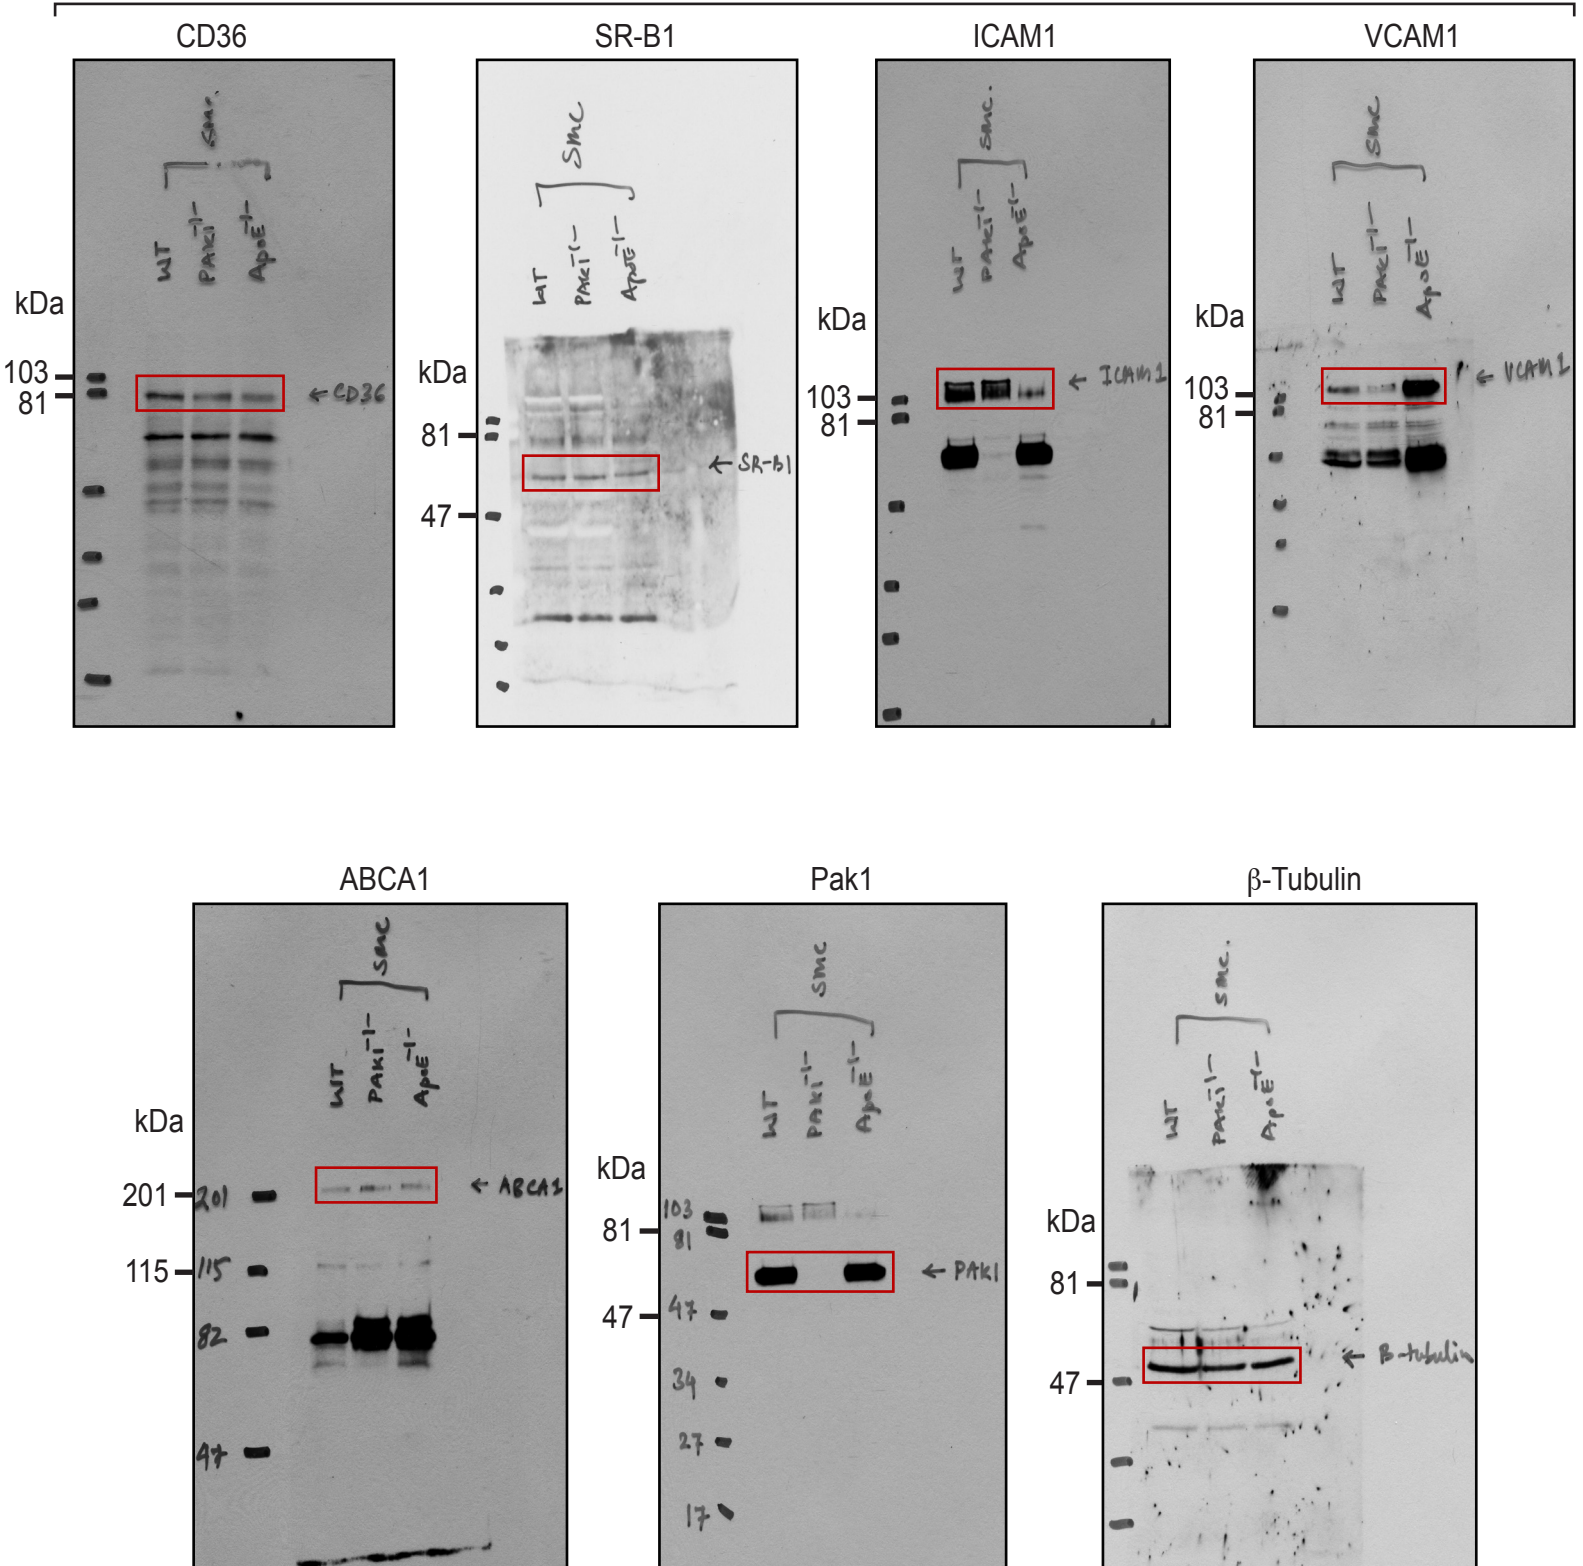

Supplementary Figure 8: Scans of immunoblots presented in Figure 5i.



Figure 6c

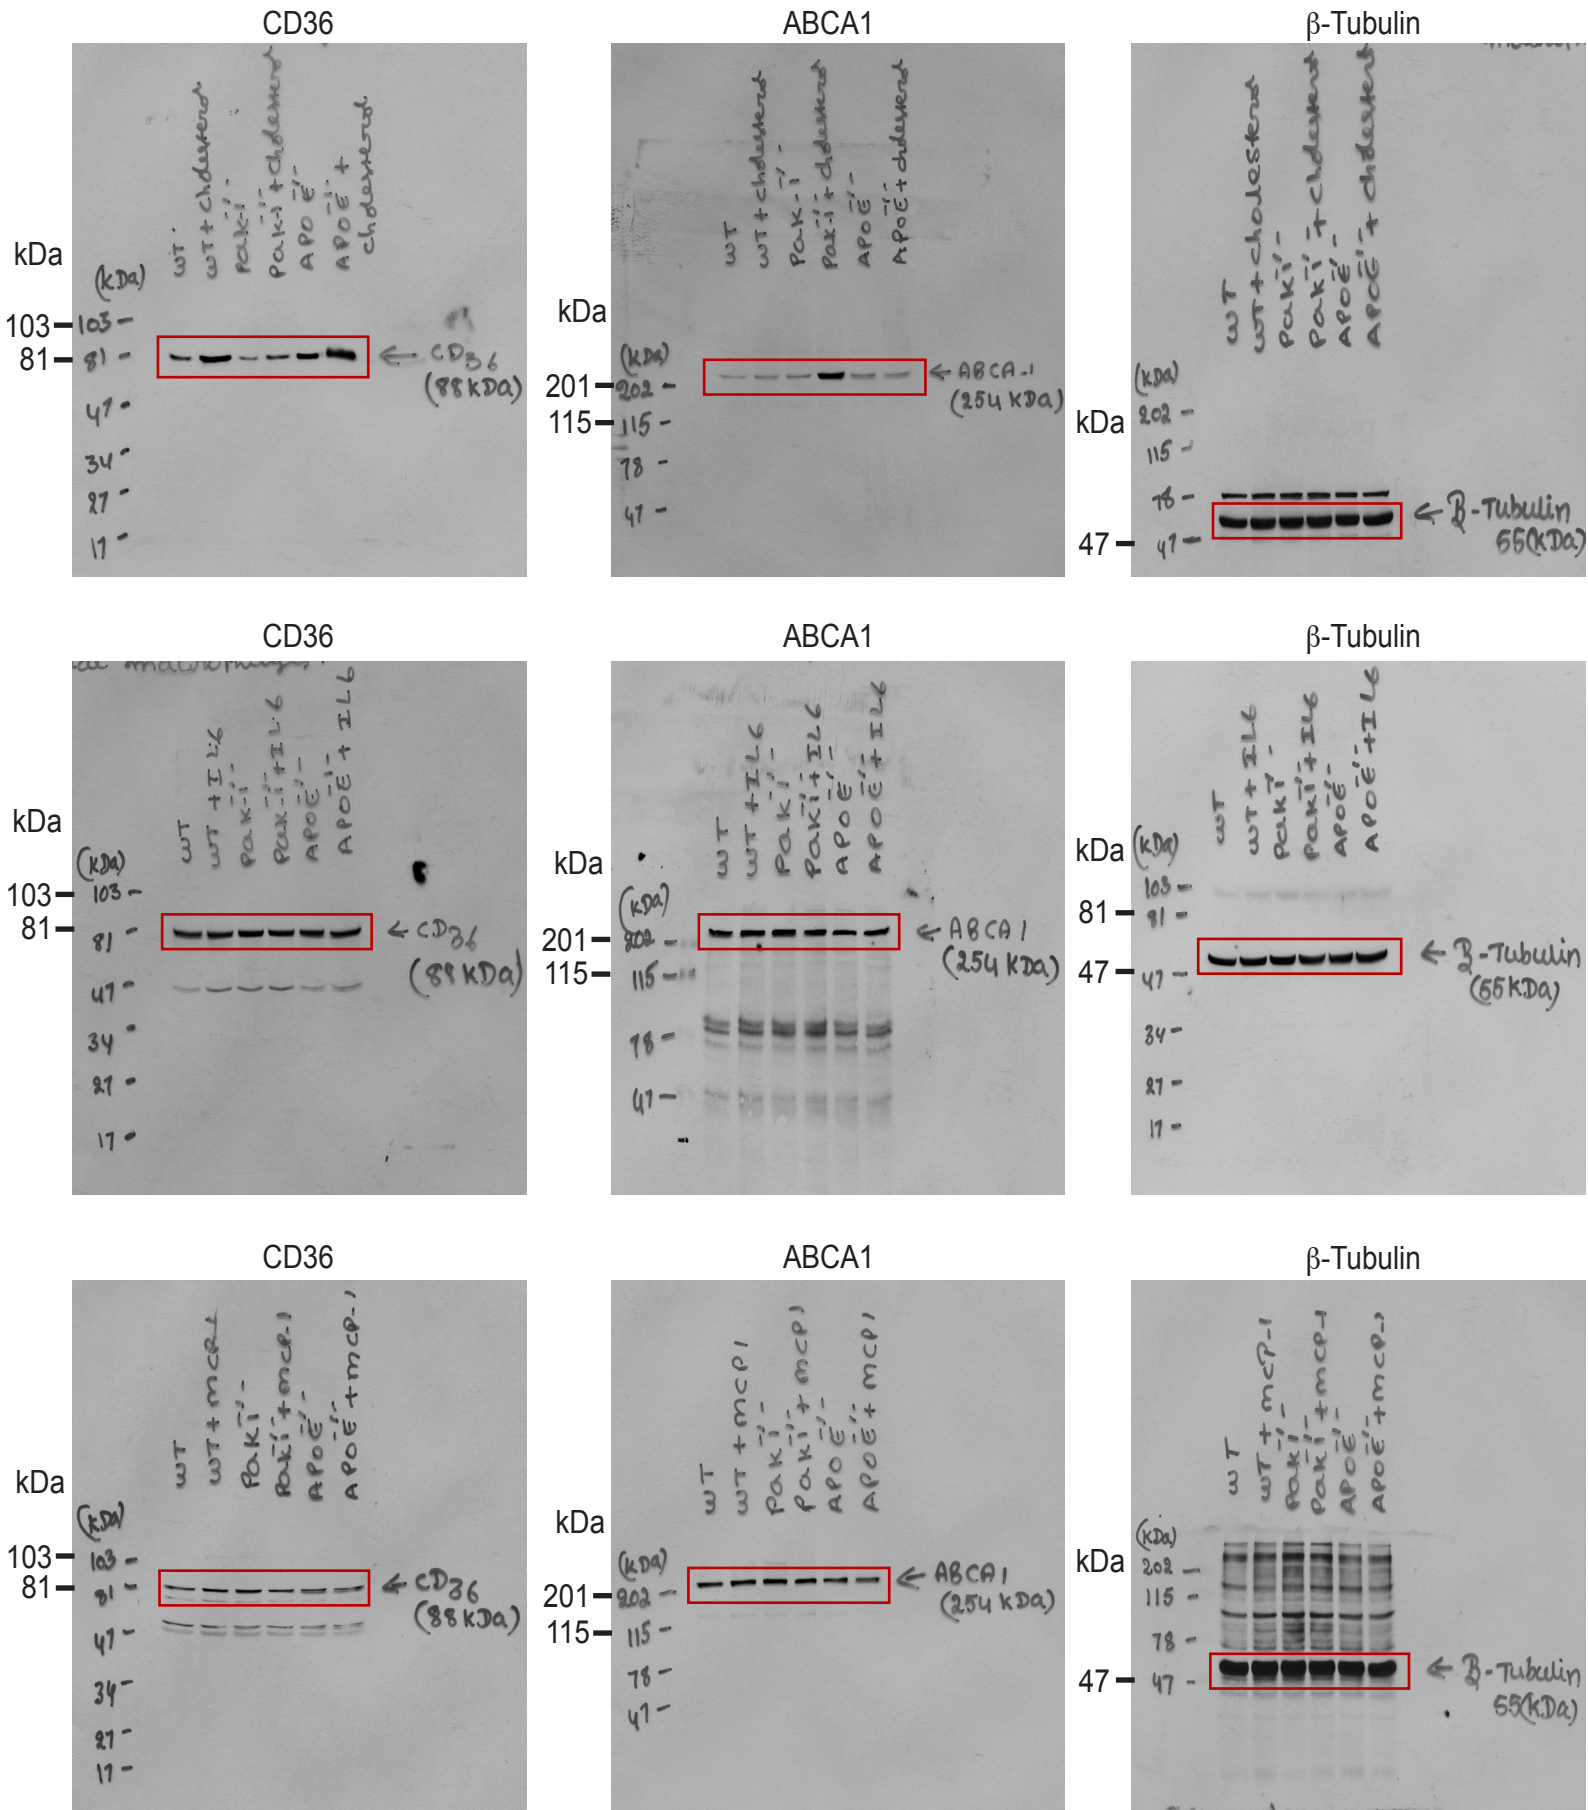

Supplementary Figure 9: Scans of immunoblots presented in Figure 6c.
